# Supplementary material for: Renewable hydrogen by aqueous-phase reforming of glucoseElectronic Supplementary Information (ESI) available: catalyst preparation and characterization; reaction kinetics studies; acknowledgements. See http://www.rsc.org/suppdata/cc/b3/b310152e/
Source: Royal Society of Chemistry journal article supplement (doi:10.1039/b310152e), 2003-12-19
Supplement: b310152e.doc [file b310152e.doc]

## Supplementary Information

Renewable hydrogen by aqueous-phase reforming of glucose

**Rupali R. Davda and James A. Dumesic***

*University of Wisconsin, Madison, 1415 Engineering Drive, Madison, Wisconsin, 53706, USA*

*Fax:1 608 262 5434; Tel: 1 608 262 1095; E-mail: dumesic@engr.wisc.edu*

**Catalyst Preparation and Characterization**

The catalyst used in this study was 3 wt% Pt supported on nano-fibers of -alumina (500 m2 g-1, Argonide Corporation). The catalyst was prepared by incipient wetness impregnation of alumina, using tetraamine platinum (IV) nitrate as the precursor salt. The catalyst was dried at 380 K for 3 h, followed by calcination at 533 K in flowing 10% O2 in N2. The metal composition of the catalyst was measured by an inductively coupled plasma emission technique (ICPE) with a Perkin Elmer Plasma 400 ICP Emission Spectrometer. Adsorption experiments using carbon monoxide at 300 K showed a CO uptake of 105 micromoles per gram of catalyst (Pt dispersion ~ 70%). The irreversible CO uptake was measured on a standard gas adsorption apparatus described elsewhere.[1]

**Reaction Kinetics Studies**

Figure 1 shows the apparatus used to conduct reaction kinetics studies of the aqueous-phase reforming of sorbitol and glucose. The catalyst was loaded into a ½” tubular stainless steel reactor. To avoid a large pressure drop across the reactor using large amounts of catalyst, the ½” tube was filled with inert crystals of fused aluminum oxide (6-10 mesh size, Aldrich). The void spaces between the fused alumina crystals were then filled with Pt/-alumina fibers (void space ~ 50% of empty tube volume). The bed of crystals and catalyst was contained in the tubular reactor between two end-plugs of quartz wool. The reactor, housed in a furnace, was mounted in an upflow configuration. The dual-reactor configuration consisted of a hydrogenation reactor followed by a reforming reactor, each mounted in a separate furnace. The temperatures of each reactor were measured using Chromomega-Alomega K-type thermocouples (Omega) attached to the outsides of the reactors, and each temperature was controlled separately. Prior to reaction kinetics studies, the fresh catalyst was reduced in flowing H2 (100 cm3(STP) min-1). The catalyst was heated, using a linear temperature ramp (1.25 K min-1) to the final reduction temperature of 523 K, held at this temperature for 2 h and then cooled to room temperature, all in flowing H2. Hydrogen (>99.99%) was purified by flowing through a bed of activated molecular sieves at room temperature. The flow-rate of H2 (and other gases) was fixed using calibrated mass-flow meters (Brooks Instruments). After reduction, the system was purged with flowing nitrogen and pressurized to the desired pressure with nitrogen. Nitrogen was purified by flowing through an OxyTrap (Alltech) followed by a bed of activated molecular sieves at room temperature. The system pressure was controlled by a backpressure regulator (GO Regulator, Model BP-60). A liquid solution containing 10 wt% sorbitol or glucose (Aldrich, >99%) in deionized water was introduced into the upflow reactor using an HPLC pump (Alltech, Model 301). For some runs, N2 or H2 gas was co-fed at the reactor inlet (e.g., for the dual-reactor run, H2 gas was co-fed at the reactor inlet). Once liquid was observed in the separator, the reactor was heated to the desired temperature over 1 h. The liquid from the pump was set at the desired flow rate. The effluent from the reactor was water-cooled in a double-pipe heat exchanger to liquefy the condensable vapors. The fluid from this cooler was combined with nitrogen sweep gas, which bubbled through the effluent and swept out the gaseous products, while the liquid effluent collected in the separator. In the cases where N2 or H2 gas streams were co-fed at the inlet of the reactor, no sweep gas was added to the reactor outlet. The effluent liquid was drained periodically for detection of the primary carbonaceous species using gas chromatography (a HP 6890 GC with a FID detector and an HP Innowax capillary column).

The effluent gas stream passed through a back-pressure regulator. This off-gas stream was analyzed with several different gas chromatographs; a) the H2 concentration using a Carle GC with a TCD detector and a Porapak Q column in series with a Hayesep T column, b) CO2, methane and ethane concentrations in a HP 5890 GC with a TCD detector and a Porapak QS column, c) methane, ethane, propane, butane, pentane and hexane concentrations in a HP 5890 GC with a TCD detector and a Hayesep D column, and d) the total hydrocarbon and other volatile oxygenates using a HP 6890 GC with a FID detector and an HP Innowax capillary column. The CO concentration of the effluent gas stream was obtained using a Siemens Ultramat 5E gas analyzer.

[1] B.E. Spiewak, J. Shen, J. A. Dumesic, *J. Phys. Chem.* **1995**, *99*, 17640.

**Acknowledgements**

This work was supported by the U.S. Department of Energy (DOE), Office of Basic Energy Sciences, Chemical Sciences Division. We thank Sibongile Nkosi for help in collecting reaction kinetics data.

**Fig S1:** Apparatus for reaction kinetics studies of the aqueous-phase reforming of glucose.
